# Supplementary material for: Biomarkers for Non-Invasive Stratification of Coronary Artery Disease and Prognostic Impact on Long-Term Survival in Patients with Stable Coronary Heart Disease
Source: MDPI journal article supplement (doi:10.3390/nu14163433), 2022-08-20
Supplement: s1 [file s1]

---

Study population **N = 3.305** patients ( **males N = 2.122** and **females N = 1.183**) admitted for clinically suspected chronic coronary syndrome, i.e., CAD and undergoing first-time coronary angiography.

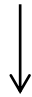

Exclusion of **233** patients (of which 121 were excluded for unknown angiographic findings and 112 for hs-cTnT  $\geq 52$  pg/ml, indicating acute coronary syndrome).

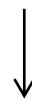

**N= 3.072** patients (**males N = 1.966**, 64%; and **females N = 1.106**, 36%) were used for the analysis. The median follow up-time for survival analysis was 10 years (range 0-14).

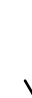

Groups studied:

CAD0 (no coronary sclerosis),  
CAD1 (non-obstructive coronary sclerosis, i.e., plaques with < 50% luminal reduction),  
obstructive CAD2 ( $\geq$  one stenosis  $\geq$  50% luminal reduction).

We primarily compared:

CAD0 + 1 vs. CAD2 (GC1: group comparison 1),  
CAD0 vs. CAD1 + 2 (GC2: group comparison 2).

**Figure S1.** Flow chart of the study design

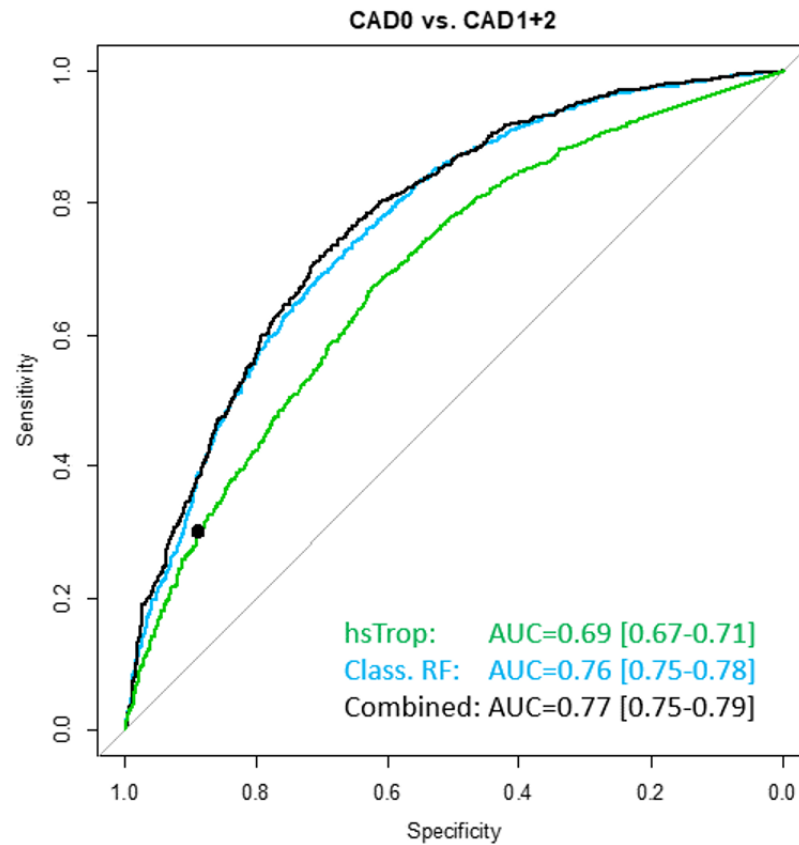

The black dot corresponds to the cut-off hsTROP=14

**Figure S2.** ROC analysis of the prediction of significant CAD (CAD0 vs. CAD1 + 2 (CG2) group comparison 2). Hs-cTnT alone (green), classical risk factors (blue), and classical risk factors + hs-cTnT (black). Hs-cTnT levels alone has an AUC of 0.69 (95% CI: 0.67–0.71). The classical risk factors—age, sex, BMI, smoking, diabetes, LDL-C, HDL-C, hypertension, WHR, triglycerides, and eGFR without hs-cTnT—showed an AUC of 0.76 (0.75–0.78) and 0.76 (0.74–0.78), respectively. The addition of hsTnT to the classical risk factors revealed a significant increment in the AUC to 0.77 (95% CI: 0.75–0.79,  $p = 0.0013$ ) and 0.77 (95% CI: 0.75–0.78,  $p = 0.029$ ), respectively. GC: group comparison, AUC: area under the curve, CI: confidence interval.
